# Supplementary material for: Evidence of a Causal Relationship Between Adiponectin Levels and Insulin Sensitivity: A Mendelian Randomization Study
Source: PubMed Central journal article supplement — Diabetes. 2013 Mar 14;62(4):1338–44. doi: 10.2337/db12-0935 (PMC3609596; doi:10.2337/db12-0935), 2013-03-14
Supplement: supp_db12-0935_DB120935SupplementaryData.pdf [file supp_db12-0935_DB120935SupplementaryData.pdf]

SUPPLEMENTARY DATA

**Supplementary Table 1.** Observed associations between instrumental variables and insulin sensitivity.

| Instrumental variable        | Beta (95% CI)         | P – value            |
|------------------------------|-----------------------|----------------------|
| Age adjusted                 |                       |                      |
| rs17300539                   | 0.096 (0.014, 0.179)  | 0.022                |
| rs3774261                    | 0.074 (0.028, 0.121)  | $1.9 \times 10^{-3}$ |
| rs6444175                    | 0.091 (0.041, 0.141)  | $3.7 \times 10^{-4}$ |
| Allele score                 | 0.242 (0.101, 0.384)  | $8.0 \times 10^{-4}$ |
| Age, BMI and waistR adjusted |                       |                      |
| rs17300539                   | 0.048 (-0.019, 0.115) | 0.157                |
| rs3774261                    | 0.036 (-0.002, 0.073) | 0.061                |
| rs6444175                    | 0.053 (0.012, 0.093)  | 0.011                |
| Allele score                 | 0.119 (0.005, 0.234)  | 0.042                |

BMI, body mass index; waistR, waist residual, i.e. BMI-adjusted waist circumference.

**Supplementary Table 2.** Secondary analyses including individuals with type 2 diabetes (N = 1,057), age-adjusted results.

| Instrumental variable | First stage F statistic | Instrumental variable estimate |                      | Observational estimate |                       | Endogeneity† P-value |
|-----------------------|-------------------------|--------------------------------|----------------------|------------------------|-----------------------|----------------------|
|                       |                         | Beta (95% CI)                  | P-value              | Beta (95% CI)          | P-value               |                      |
| rs17300539            | 49.8                    | 0.549 (0.179, 0.920)           | $3.7 \times 10^{-3}$ | 0.612 (0.533, 0.690)   | $1.7 \times 10^{-47}$ | 0.736                |
| rs3774261             | 33.4                    | 0.620 (0.171, 1.068)           | $6.9 \times 10^{-3}$ |                        |                       | 0.972                |
| rs6444175             | 31.6                    | 0.722 (0.260, 1.185)           | $2.2 \times 10^{-3}$ |                        |                       | 0.632                |
| Allele score*         | 55.9                    | 0.591 (0.241, 0.942)           | $9.7 \times 10^{-4}$ |                        |                       | 0.908                |

\*The allele score was created using genotypes for rs17300539 and rs3774261 ( $R^2 = 0.137$ ).

†Endogeneity was assessed by Durbin-Wu-Hausman test and reflects whether the difference between the IV estimate and the observational estimate was statistically significant.

**Supplementary Table 3.** Association between instrumental variables and body mass index (BMI).

|                     | Age adjusted         |         | Age and adiponectin adjusted |         |
|---------------------|----------------------|---------|------------------------------|---------|
|                     | Beta (95% CI)        | P-value | Beta (95% CI)                | P-value |
| <b>rs17300539</b>   | -0.47 (-1.00, 0.06)  | 0.084   | 0.06 (-0.46, 0.58)           | 0.815   |
| <b>rs3774261</b>    | -0.42 (-0.72, -0.12) | 0.006   | -0.15 (-0.44, 0.15)          | 0.330   |
| <b>rs6444175</b>    | -0.44 (-0.77, -0.12) | 0.008   | -0.15 (-0.47, 0.16)          | 0.337   |
| <b>Allele score</b> | -1.32 (-2.24, -0.41) | 0.005   | -0.29 (-1.20, -0.61)         | 0.522   |

SUPPLEMENTARY DATA

**Supplementary Table 4.** Comparison of instrumental variable estimated and observed association between adiponectin and insulin sensitivity, stratified by overweight status defined by median BMI.

| Instrumental variable                                  | First stage F statistic | Instrumental variable estimate |         | Observational estimate |                         | Endogeneity†<br>P-value |
|--------------------------------------------------------|-------------------------|--------------------------------|---------|------------------------|-------------------------|-------------------------|
|                                                        |                         | Beta (95% CI)                  | P-value | Beta (95% CI)          | P-value                 |                         |
| Normal weight (BMI < 25.7 kg/m <sup>2</sup> ), N = 471 |                         |                                |         |                        |                         |                         |
| rs17300539                                             | 25.4                    | 0.459 (0.061, 0.858)           | 0.024   | 0.228 (0.140, 0.316)   | 5.9 × 10 <sup>-7</sup>  | 0.230                   |
| rs3774261                                              | 16.0                    | 0.199 (-0.285, 0.684)          | 0.420   |                        |                         | 0.902                   |
| rs6444175                                              | 13.2                    | 0.476 (-0.073, 1.025)          | 0.090   |                        |                         | 0.354                   |
| Allele score*                                          | 27.5                    | 0.309 (-0.066, 0.684)          | 0.107   |                        |                         | 0.662                   |
| Overweight (BMI ≥ 25.7 kg/m <sup>2</sup> ), N = 471    |                         |                                |         |                        |                         |                         |
| rs17300539                                             | 16.2                    | 0.244 (-0.418, 0.907)          | 0.470   | 0.526 (0.407, 0.645)   | 7.5 × 10 <sup>-17</sup> | 0.386                   |
| rs3774261                                              | 14.9                    | 0.746 (0.060, 1.432)           | 0.033   |                        |                         | 0.517                   |
| rs6444175                                              | 15.4                    | 0.719 (0.048, 1.390)           | 0.036   |                        |                         | 0.562                   |
| Allele score                                           | 22.2                    | 0.564 (0.006, 1.121)           | 0.048   |                        |                         | 0.892                   |

\*The allele score was created using genotypes for rs17300539 and rs3774261 ( $R^2 = 0.137$ ). †Endogeneity was assessed by Durbin-Wu-Hausman test and reflects whether the difference between the IV estimate and the observational estimate was statistically significant.

SUPPLEMENTARY DATA

**Supplementary Table 5.** Effect size comparison between ULSAM cohort and other studies for the SNPs used as instrumental variables.

| SNP        | N      | Effect allele | Effect* (95% CI)      | P-value               | Adjustment                   | Reference     |
|------------|--------|---------------|-----------------------|-----------------------|------------------------------|---------------|
| rs17300539 | 942    | A             | 0.205 (0.144, 0.267)  | $1.1 \times 10^{-10}$ | Age adjusted                 | Current study |
|            |        |               | 0.188 (0.128, 0.247)  | $8.1 \times 10^{-10}$ | Age, BMI and waistR adjusted |               |
|            | 1,919  | A             | 0.155 (0.077, 0.233)  | $9.3 \times 10^{-5}$  | Age, sex and BMI adjusted    | [1]           |
| rs3774261  | 941    | A             | 0.109 (0.074, 0.144)  | $1.3 \times 10^{-9}$  | Age adjusted                 | Current study |
|            |        |               | 0.092 (0.059, 0.126)  | $8.0 \times 10^{-8}$  | Age, BMI and waistR adjusted |               |
|            | 11,519 | A             | 0.04 (no CI reported) | $4.7 \times 10^{-8}$  | Not mentioned                | [2]           |
| rs6444175  | 942    | A             | 0.113 (0.076, 0.151)  | $5.3 \times 10^{-9}$  | Age adjusted                 | Current study |
|            |        |               | 0.098 (0.061, 0.134)  | $1.5 \times 10^{-7}$  | Age, BMI and waistR adjusted |               |
|            | 14,733 | G             | -0.08 (-0.1, -0.07)   | $1.2 \times 10^{-21}$ | Age, sex and BMI adjusted    | [3]           |

\* All the results reported are based on natural log-transformed adiponectin.

SUPPLEMENTARY DATA

**Supplementary Figure 1.** Instrumental variable estimated percent change in insulin sensitivity with varying percent change in adiponectin levels. The instrumental variable point estimates were used to calculate the change in insulin sensitivity when adiponectin changes by a certain percentage. The black lines are based on age adjusted results: rs17300539, black long dash; rs3774261, black dash; rs6444175, black solid; allele score, black short dash with dot. Grey lines are the results further adjusted for adiposity.

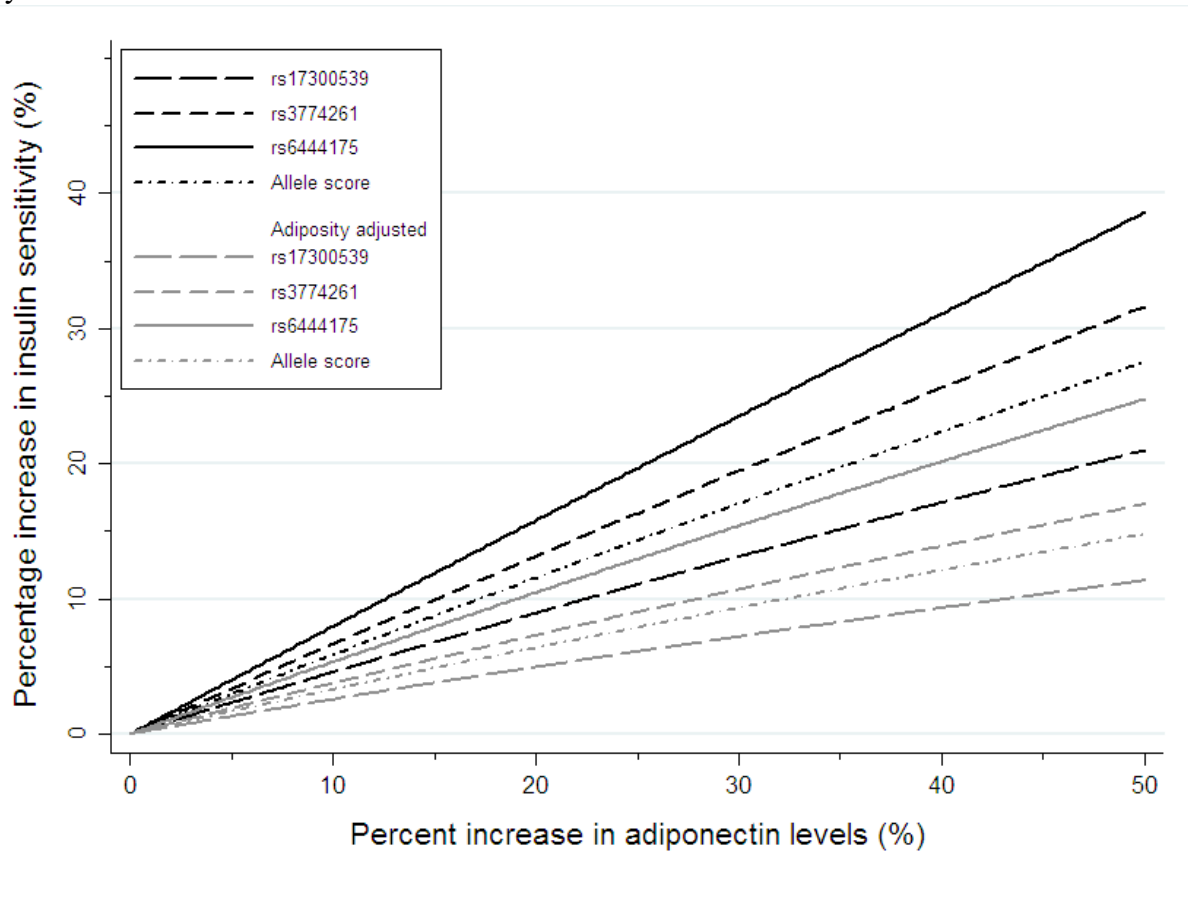

- [1] Henneman, P., Y. S. Aulchenko, et al. (2010). "Genetic architecture of plasma adiponectin overlaps with the genetics of metabolic syndrome-related traits." *Diabetes Care* 33(4): 908-913.
- [2] Warren, L. L., L. Li, et al. (2012). "Deep Resequencing Unveils Genetic Architecture of ADIPOQ and Identifies a Novel Low-Frequency Variant Strongly Associated With Adiponectin Variation." *Diabetes* 61(5): 1297-1301.
- [3] Abecasis, G. R., J. B. Richards, et al. (2009). "A Genome-Wide Association Study Reveals Variants in ARL15 that Influence Adiponectin Levels." *PLoS Genetics* 5(12): e1000768.
